# Supplementary material for: Economic evaluation of the Target-D platform to match depression management to severity prognosis in primary care: A within-trial cost-utility analysis
Source: PubMed Central journal article supplement (PMC9132336; doi:10.1371/journal.pone.0268948), 2022-05-25
Supplement: pone.0268948.s002.pdf [file pone.0268948.s002.pdf]

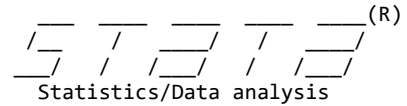

User: Yong Yi Lee  
Project: Target\_D

1 . codebook

| study_id                         |                   |        |      |        |      | Study identifier                                                                                                                                                                                                 |
|----------------------------------|-------------------|--------|------|--------|------|------------------------------------------------------------------------------------------------------------------------------------------------------------------------------------------------------------------|
| Type: Numeric (int)              |                   |        |      |        |      | <b>NOTE:</b> Follow-up periods are denoted by the following suffixes appended to each variable name.<br><br>_t = Baseline<br>_0 = Baseline<br>_1 = Baseline<br>_2 = 3-month follow-up<br>_3 = 12-month follow-up |
| Range: [1,4371]                  | Units: 1          |        |      |        |      |                                                                                                                                                                                                                  |
| Unique values: 1,868             | Missing : 0/1,868 |        |      |        |      |                                                                                                                                                                                                                  |
| Mean: 2403.31                    |                   |        |      |        |      |                                                                                                                                                                                                                  |
| Std. dev.: 1206.56               |                   |        |      |        |      |                                                                                                                                                                                                                  |
| Percentiles: 10% 25% 50% 75% 90% | 681               | 1389.5 | 2445 | 3445.5 | 3992 |                                                                                                                                                                                                                  |

| group                |                   |              |  | Randomisation group |
|----------------------|-------------------|--------------|--|---------------------|
| Type: Numeric (byte) |                   |              |  |                     |
| Label: group_lbl     |                   |              |  |                     |
| Range: [0,1]         | Units: 1          |              |  |                     |
| Unique values: 2     | Missing : 0/1,868 |              |  |                     |
| Tabulation: Freq.    | Numeric           | Label        |  |                     |
| 935                  | 0                 | Control      |  |                     |
| 933                  | 1                 | Intervention |  |                     |

| phqdep_total_impute_t            |                   |   |   |    |    | Depression - PHQ-9 score (baseline) |
|----------------------------------|-------------------|---|---|----|----|-------------------------------------|
| Type: Numeric (float)            |                   |   |   |    |    |                                     |
| Range: [0,27]                    | Units: 1          |   |   |    |    |                                     |
| Unique values: 28                | Missing : 0/1,868 |   |   |    |    |                                     |
| Mean: 9.23233                    |                   |   |   |    |    |                                     |
| Std. dev.: 5.71362               |                   |   |   |    |    |                                     |
| Percentiles: 10% 25% 50% 75% 90% | 3                 | 5 | 8 | 13 | 17 |                                     |

| clinic_0                         |                   |   |    |    |    | Clinic |
|----------------------------------|-------------------|---|----|----|----|--------|
| Type: Numeric (byte)             |                   |   |    |    |    |        |
| Range: [1,14]                    | Units: 1          |   |    |    |    |        |
| Unique values: 14                | Missing : 0/1,868 |   |    |    |    |        |
| Mean: 8.93737                    |                   |   |    |    |    |        |
| Std. dev.: 3.65385               |                   |   |    |    |    |        |
| Percentiles: 10% 25% 50% 75% 90% | 4                 | 5 | 10 | 12 | 13 |        |

| risk                 |                   |  |  |  |  | Prognostic group |
|----------------------|-------------------|--|--|--|--|------------------|
| Type: Numeric (byte) |                   |  |  |  |  |                  |
| Label: risk          |                   |  |  |  |  |                  |
| Range: [1,3]         | Units: 1          |  |  |  |  |                  |
| Unique values: 3     | Missing : 0/1,868 |  |  |  |  |                  |

|             |       |         |          |
|-------------|-------|---------|----------|
| Tabulation: | Freq. | Numeric | Label    |
|             | 1,357 | 1       | Mild     |
|             | 288   | 2       | Moderate |
|             | 223   | 3       | Severe   |

**age\_num\_0** **Age**

Type: Numeric (**double**)

Range: [18,65] Units: 1  
 Unique values: 48 Missing .: 0/1,868

Mean: 35.531  
 Std. dev.: 12.0869

|              |     |     |     |     |     |
|--------------|-----|-----|-----|-----|-----|
| Percentiles: | 10% | 25% | 50% | 75% | 90% |
|              | 22  | 26  | 33  | 44  | 55  |

**gender\_0** **Gender**

Type: Numeric (**byte**)  
 Label: **gender**

Range: [0,2] Units: 1  
 Unique values: 3 Missing .: 0/1,868

|             |       |         |        |
|-------------|-------|---------|--------|
| Tabulation: | Freq. | Numeric | Label  |
|             | 590   | 0       | Male   |
|             | 1,270 | 1       | Female |
|             | 8     | 2       | Other  |

**costintv** **Intervention cost (applies to intervention group only)**

Type: Numeric (**float**)

Range: [0,676.96] Units: .01  
 Unique values: 4 Missing .: 0/1,868

|             |       |           |
|-------------|-------|-----------|
| Tabulation: | Freq. | Value     |
|             | 935   | 0         |
|             | 679   | 14.96     |
|             | 143   | 132.96001 |
|             | 111   | 676.96002 |

**SA1\_costintv** **Intervention cost under sensitivity analysis incorporating sunk costs for Target-D  
CPT research & development**

Type: Numeric (**float**)

Range: [0,678.3] Units: .1  
 Unique values: 4 Missing .: 0/1,868

|             |       |           |
|-------------|-------|-----------|
| Tabulation: | Freq. | Value     |
|             | 935   | 0         |
|             | 679   | 16.299999 |
|             | 143   | 134.3     |
|             | 111   | 678.29999 |

**SA2\_costintv** **Intervention cost under sensitivity analysis with higher unit cost for moderate  
prognostic group**

Type: Numeric (**float**)

Range: [0,676.96] Units: .01  
 Unique values: 4 Missing .: 0/1,868

Tabulation: Freq. Value  
 935 0  
 679 14.96  
 143 222.96001  
 111 676.96002

**costtohealthprof\_2** Total cost of health professional visits (3 months)

Type: Numeric (float)

Range: [0,4021.0701] Units: 1.000e-06  
 Unique values: 711 Missing .: 809/1,868

Mean: 340.673  
 Std. dev.: 418.347

Percentiles: 10% 25% 50% 75% 90%  
 0 42.5987 228.087 491.278 806.205

**costtotervisit\_2** Total cost of emergency department visits (3 months)

Type: Numeric (float)

Range: [0,2236.36] Units: .01  
 Unique values: 8 Missing .: 846/1,868

Tabulation: Freq. Value  
 953 0  
 1 4.5  
 2 554.59003  
 53 559.09003  
 6 659.09003  
 5 1118.1801  
 1 1188.1801  
 1 2236.3601  
 846 .

**costtotovnstay\_2** Total cost of overnight hospital stays (3 months)

Type: Numeric (float)

Range: [0,26772.9] Units: .1  
 Unique values: 11 Missing .: 847/1,868

Mean: 252.687  
 Std. dev.: 1899.1

Percentiles: 10% 25% 50% 75% 90%  
 0 0 0 0 0

**costtotdiagtest\_2** Total cost of diagnostic tests (3 months)

Type: Numeric (float)

Range: [0,2028.84] Units: .01  
 Unique values: 130 Missing .: 835/1,868

Mean: 67.4869  
 Std. dev.: 165.32

Percentiles: 10% 25% 50% 75% 90%  
 0 0 0 49.76 177.23

**costtotmed\_2** Total cost of medications (3 months)

Type: Numeric (float)  
 Range: [0,488.25] Units: .01  
 Unique values: 118 Missing : 844/1,868  
 Mean: 17.6252  
 Std. dev.: 41.426  
 Percentiles: 10% 25% 50% 75% 90%  
 0 0 0 23.17 55.93

**costtohealthprof\_3** Total cost of health professional visits (12 months)

Type: Numeric (float)  
 Range: [0,6171.1445] Units: 1.000e-06  
 Unique values: 602 Missing : 1,070/1,868  
 Mean: 503.983  
 Std. dev.: 586.04  
 Percentiles: 10% 25% 50% 75% 90%  
 0 83.852 301.507 741.049 1280.5

**costtotervisit\_3** Total cost of emergency department visits (12 months)

Type: Numeric (float)  
 Range: [0,1677.27] Units: .01  
 Unique values: 9 Missing : 1,113/1,868  
 Tabulation: Freq. Value  
 687 0  
 1 99  
 4 554.59003  
 55 559.09003  
 1 563.59003  
 2 659.09003  
 3 1118.1801  
 1 1218.1801  
 1 1677.27  
 1,113 .

**costtotovnstay\_3** Total cost of overnight hospital stays (12 months)

Type: Numeric (float)  
 Range: [0,24339] Units: .1  
 Unique values: 10 Missing : 1,113/1,868  
 Mean: 538.359  
 Std. dev.: 2365.24  
 Percentiles: 10% 25% 50% 75% 90%  
 0 0 0 0 0

---

**costtotdiagtest\_3** **Total cost of diagnostic tests (12 months)**

---

Type: Numeric (float)

Range: [0,2419.07] Units: .01  
 Unique values: 145 Missing .: 1,104/1,868

Mean: 101.61  
 Std. dev.: 217.935

|              |     |     |       |       |        |
|--------------|-----|-----|-------|-------|--------|
| Percentiles: | 10% | 25% | 50%   | 75%   | 90%    |
|              | 0   | 0   | 24.88 | 82.16 | 279.91 |

---

**costtotmed\_3** **Total cost of medications (12 months)**

---

Type: Numeric (float)

Range: [0,995.05] Units: .01  
 Unique values: 114 Missing .: 1,107/1,868

Mean: 53.5464  
 Std. dev.: 115.896

|              |     |     |     |       |        |
|--------------|-----|-----|-----|-------|--------|
| Percentiles: | 10% | 25% | 50% | 75%   | 90%    |
|              | 0   | 0   | 0   | 79.02 | 153.03 |

---

**costtotprodloss\_2** **Total productivity losses (3 months)**

---

Type: Numeric (float)

Range: [0,45090.672] Units: .0001  
 Unique values: 238 Missing .: 841/1,868

Mean: 4697.63  
 Std. dev.: 5586.42

|              |     |     |         |        |         |
|--------------|-----|-----|---------|--------|---------|
| Percentiles: | 10% | 25% | 50%     | 75%    | 90%     |
|              | 0   | 0   | 3119.77 | 7737.8 | 11561.3 |

---

**costtotprodloss\_3** **Total productivity losses (12 months)**

---

Type: Numeric (float)

Range: [0,82854.328] Units: .0001  
 Unique values: 253 Missing .: 1,103/1,868

Mean: 11459  
 Std. dev.: 12577.1

|              |     |     |         |         |       |
|--------------|-----|-----|---------|---------|-------|
| Percentiles: | 10% | 25% | 50%     | 75%     | 90%   |
|              | 0   | 0   | 8438.29 | 18381.3 | 26852 |

---

**AQoL8DUtility\_1** **AQoL-8D utility score (baseline)**

---

Type: Numeric (float)

Range: [.11649436,1] Units: 1.000e-08  
 Unique values: 1,684 Missing .: 184/1,868

Mean: .569382  
 Std. dev.: .196468

|              |       |         |         |         |         |
|--------------|-------|---------|---------|---------|---------|
| Percentiles: | 10%   | 25%     | 50%     | 75%     | 90%     |
|              | .3115 | .422853 | .553744 | .714437 | .847783 |

**AQoL8DUtility\_2** AQoL-8D utility score (3 months)

Type: Numeric (float)

Range: [.11332551,1]                      Units: 1.000e-08  
 Unique values: 1,012                      Missing .: 856/1,868

Mean: .592451  
 Std. dev.: .203951

|              |         |         |        |         |         |
|--------------|---------|---------|--------|---------|---------|
| Percentiles: | 10%     | 25%     | 50%    | 75%     | 90%     |
|              | .321678 | .431112 | .58164 | .749469 | .878988 |

**AQoL8DUtility\_3** AQoL-8D utility score (12 months)

Type: Numeric (float)

Range: [.14523593,.99968475]                      Units: 1.000e-08  
 Unique values: 750                      Missing .: 1,118/1,868

Mean: .609107  
 Std. dev.: .204689

|              |         |        |         |         |         |
|--------------|---------|--------|---------|---------|---------|
| Percentiles: | 10%     | 25%    | 50%     | 75%     | 90%     |
|              | .330536 | .45506 | .607112 | .782252 | .888144 |

**phqdep\_total\_impute\_2** Depression - PHQ-9 score (3 months)

Type: Numeric (float)

Range: [0,27]                                      Units: 1  
 Unique values: 28                                      Missing .: 606/1,868

Mean: 8.73296  
 Std. dev.: 6.2971

|              |     |     |     |     |     |
|--------------|-----|-----|-----|-----|-----|
| Percentiles: | 10% | 25% | 50% | 75% | 90% |
|              | 1   | 4   | 7   | 13  | 18  |

**phqdep\_total\_impute\_3** Depression - PHQ-9 score (12 months)

Type: Numeric (float)

Range: [0,27]                                      Units: 1  
 Unique values: 28                                      Missing .: 703/1,868

Mean: 8.11674  
 Std. dev.: 6.03413

|              |     |     |     |     |     |
|--------------|-----|-----|-----|-----|-----|
| Percentiles: | 10% | 25% | 50% | 75% | 90% |
|              | 1   | 3   | 7   | 12  | 17  |

**education\_rec\_0** Highest level of education attained

Type: Numeric (float)  
 Label: education\_rec

Range: [1,4] Units: 1  
 Unique values: 4 Missing : 0/1,868

| Tabulation: | Freq. | Numeric | Label                                |
|-------------|-------|---------|--------------------------------------|
|             | 221   | 1       | <Year 10/Year 10/equiv/Year 11/equiv |
|             | 282   | 2       | Year 12/equiv                        |
|             | 441   | 3       | Certificate/diploma                  |
|             | 924   | 4       | Bachelor degree or higher            |

**employment\_0** Employment status

Type: Numeric (byte)  
 Label: employment

Range: [0,3] Units: 1  
 Unique values: 3 Missing : 0/1,868

| Tabulation: | Freq. | Numeric | Label                                |
|-------------|-------|---------|--------------------------------------|
|             | 1,353 | 0       | Employed/working                     |
|             | 211   | 2       | Unemployed and looking for work      |
|             | 304   | 3       | Neither working nor looking for work |

**card\_none\_0** Health care card status

Type: Numeric (float)  
 Label: yesno

Range: [0,1] Units: 1  
 Unique values: 2 Missing : 0/1,868

| Tabulation: | Freq. | Numeric | Label |
|-------------|-------|---------|-------|
|             | 473   | 0       | No    |
|             | 1,395 | 1       | Yes   |

**illness\_t** Long-term illness status

Type: Numeric (byte)  
 Label: yesno

Range: [0,1] Units: 1  
 Unique values: 2 Missing : 0/1,868

| Tabulation: | Freq. | Numeric | Label |
|-------------|-------|---------|-------|
|             | 1,353 | 0       | No    |
|             | 515   | 1       | Yes   |

**health\_0** Self-rated health

Type: Numeric (byte)  
 Label: health

Range: [1,5] Units: 1  
 Unique values: 5 Missing : 0/1,868

| Tabulation: | Freq. | Numeric | Label     |
|-------------|-------|---------|-----------|
|             | 102   | 1       | Excellent |
|             | 580   | 2       | Very good |
|             | 779   | 3       | Good      |
|             | 319   | 4       | Fair      |
|             | 88    | 5       | Poor      |

---

**live\_alone\_0** **Live alone?**

---

Type: Numeric (float)  
Label: **yesno**

Range: [0,1]                                 Units: 1  
Unique values: 2                             Missing .: 0/1,868

Tabulation:

| Freq.        | Numeric | Label |
|--------------|---------|-------|
| <b>1,629</b> | 0       | No    |
| <b>239</b>   | 1       | Yes   |

---

**incomerec2\_t** **Ability to manage on available income**

---

Type: Numeric (float)  
Label: **incomerec**

Range: [1,2]                                 Units: 1  
Unique values: 2                             Missing .: 0/1,868

Tabulation:

| Freq.        | Numeric | Label                      |
|--------------|---------|----------------------------|
| <b>1,649</b> | 1       | Easily/Not too bad         |
| <b>219</b>   | 2       | Difficult some of the time |

---

**psychpast\_visited\_0** **Visited psychologist or counsellor in 12 months**

---

Type: Numeric (float)  
Label: **yesno**

Range: [0,1]                                 Units: 1  
Unique values: 2                             Missing .: 0/1,868

Tabulation:

| Freq.        | Numeric | Label |
|--------------|---------|-------|
| <b>1,078</b> | 0       | No    |
| <b>790</b>   | 1       | Yes   |

---

**antidepressants\_0** **Currently using antidepressants?**

---

Type: Numeric (float)  
Label: **yesno**

Range: [0,1]                                 Units: 1  
Unique values: 2                             Missing .: 0/1,868

Tabulation:

| Freq.        | Numeric | Label |
|--------------|---------|-------|
| <b>1,452</b> | 0       | No    |
| <b>416</b>   | 1       | Yes   |



```

1
2
3 *****
4 *****
5 *****
6 *****          STATA DO-FILE FOR TARGET-D ANALYSIS          *****
7 *****
8 *****
9 *****
10
11
12 * NOTE: Use code below to conduct analysis of Target-D data set
13 *
14 * Code is split into 3 modules:
15 * (1) Complete case analysis;
16 * (2) Multiple imputation; and
17 * (3) Bootstrap analysis.
18 *
19 *
20
21
22
23 *****
24 *****          MODULE 1 - COMPLETE CASE ANALYSIS          *****
25 *****
26
27 *****
28 ***   DATA PREPARATION   ***
29 *****
30
31 *** PREPARATORY CODE FOR COMPLETE CASE ANALYSIS
32
33 ** Set working directory
34
35 cd "C:\Stata"
36
37
38 ** Load original dataset, keep in-scope variables and save the revised dataset
39
40 clear all
41 use "C:\Stata\TargetD_MERGED_edited.dta", replace
42
43 global var_sid study_id
44
45 global var_reg group phqdep_total_impute_t clinic_0 risk /// *Regular_variables
46                age_num_0 gender_0 costintv SA1_costintv SA2_costintv
47
48 global var_imp costtohealthprof_2 costtotervisit_2 /// *Imputed_variables
49                costtotovnstay_2 costtotdiagtest_2 costtotmed_2 ///
50                costtohealthprof_3 costtotervisit_3 costtotovnstay_3 ///
51                costtotdiagtest_3 costtotmed_3 ///
52                costtotprodloss_2 costtotprodloss_3 ///
53                AQL8DUtility_1 AQL8DUtility_2 AQL8DUtility_3 ///
54                phqdep_total_impute_2 phqdep_total_impute_3
55
56 global var_adj education_rec_0 employment_0 /// *SA3_adjustment_variables
57                card_none_0 illness_t health_0 live_alone_0 ///
58                incomerec2_t psychpast_visited_0 antidepressants_0
59
60 keep $var_sid $var_reg $var_imp $var_adj
61 order $var_sid $var_reg $var_imp $var_adj
62
63 save "C:\Stata\TargetD_MERGED_inscope.dta", replace
64
65
66 ** Load revised dataset containing only the in-scope variables
67
68 clear all
69 use "C:\Stata\TargetD_MERGED_inscope.dta", replace
70
71
72 ** Add aggregate cost variables by study perspective
73
74 * Health sector perspective
75
76 gen costhealthsector_2 = costtohealthprof_2 + costtotervisit_2 + ///
77                        costtotovnstay_2 + costtotdiagtest_2 + ///
78                        costtotmed_2 + costintv
79

```

```

80 gen costhealthsector_3 = costtohealthprof_3 + costtotervisit_3 + ///
81 costtotovnstay_3 + costtotdiagtest_3 + ///
82 costtotmed_3
83
84 gen costhealthsectortot = costhealthsector_2 + costhealthsector_3
85
86 * Societal perspective
87
88 gen costsocietal_2 = costhealthsector_2 + costtotprodloss_2
89
90 gen costsocietal_3 = costhealthsector_3 + costtotprodloss_3
91
92 gen costsocietaltot = costsocietal_2 + costsocietal_3
93
94
95 ** Add aggregate QALY variables
96
97 gen qaly_2 = 0.5*(AQoL8DUtility_1 + AQoL8DUtility_2)*(3/12)
98 gen qaly_3 = 0.5*(AQoL8DUtility_2 + AQoL8DUtility_3)*(9/12)
99 gen qalytot = qaly_2 + qaly_3
100
101
102
103 *****
104 *** TARGET_D - COMPLETE CASE ANALYSIS ***
105 *****
106
107 *** GLM ANALYSIS OF COST VARIABLES AT 3-MONTH FOLLOW-UP (T2)
108
109 ** Analysis of health sector costs - 3-month follow-up (T2)
110
111 * Adjusted for baseline outcome and stratification factors
112
113 glm costhealthsector_2 i.group phqdep_total_impute_t i.clinic_0 i.risk, family(gamma) link
114 (log) eform
115
116 * Subgroup analysis
117
118 glm costhealthsector_2 i.group phqdep_total_impute_t i.clinic_0 if risk==1, family(gamma)
119 link(log) eform
120
121 glm costhealthsector_2 i.group phqdep_total_impute_t i.clinic_0 if risk==2, family(gamma)
122 link(log) eform
123
124 glm costhealthsector_2 i.group phqdep_total_impute_t i.clinic_0 if risk==3, family(gamma)
125 link(log) eform
126
127
128 ** Analysis of societal costs - 3-month follow-up (T2)
129
130 * Adjusted for baseline outcome and stratification factors
131
132 glm costsocietal_2 i.group phqdep_total_impute_t i.clinic_0 i.risk, family(gamma) link(log)
133 eform
134
135 * Subgroup analysis
136
137 glm costsocietal_2 i.group phqdep_total_impute_t i.clinic_0 if risk==1, family(gamma) link
138 (log) eform
139
140 glm costsocietal_2 i.group phqdep_total_impute_t i.clinic_0 if risk==2, family(gamma) link
141 (log) eform
142
143 glm costsocietal_2 i.group phqdep_total_impute_t i.clinic_0 if risk==3, family(gamma) link
144 (log) eform
145
146
147 *** GLM ANALYSIS OF COST VARIABLES AT 12-MONTH FOLLOW-UP (T2+T3)
148
149 ** Analysis of health sector costs - 12-month follow-up (T2+T3)
150
151 * Adjusted for baseline outcome and stratification factors
152
153 glm costhealthsectortot i.group phqdep_total_impute_t i.clinic_0 i.risk, family(gamma)
154 link(log) eform
155
156 * Subgroup analysis
157
158 glm costhealthsectortot i.group phqdep_total_impute_t i.clinic_0 if risk==1, family(gamma)
159 link(log) eform
160
161 glm costhealthsectortot i.group phqdep_total_impute_t i.clinic_0 if risk==2, family(gamma)
162 link(log) eform

```

```

148 glm costhealthsectortot i.group phqdep_total_impute_t i.clinic_0 if risk==3, family(gamma)
    link(log) eform
149
150
151 ** Analysis of societal costs - 12-month follow-up (T2+T3)
152
153 * Adjusted for baseline outcome and stratification factors
154
155 glm costsocietaltot i.group phqdep_total_impute_t i.clinic_0 i.risk, family(gamma) link(
    log) eform
156
157 * Subgroup analysis
158
159 glm costsocietaltot i.group phqdep_total_impute_t i.clinic_0 if risk==1, family(gamma)
    link(log) eform
160 glm costsocietaltot i.group phqdep_total_impute_t i.clinic_0 if risk==2, family(gamma)
    link(log) eform
161 glm costsocietaltot i.group phqdep_total_impute_t i.clinic_0 if risk==3, family(gamma)
    link(log) eform
162
163
164
165 *** GLM ANALYSIS OF QALYS AT 3-MONTH FOLLOW-UP (T2)
166
167 ** Analysis of QALYS - 3-month follow-up (T2)
168
169 * Adjusted for baseline utility, baseline outcome and stratification factors
170
171 glm qaly_2 i.group AQoL8DUtility_1 phqdep_total_impute_t i.clinic_0 i.risk, family(
    gaussian) link(identity)
172
173 * Subgroup analysis
174
175 glm qaly_2 i.group AQoL8DUtility_1 phqdep_total_impute_t i.clinic_0 if risk==1, family(
    gaussian) link(identity)
176 glm qaly_2 i.group AQoL8DUtility_1 phqdep_total_impute_t i.clinic_0 if risk==2, family(
    gaussian) link(identity)
177 glm qaly_2 i.group AQoL8DUtility_1 phqdep_total_impute_t i.clinic_0 if risk==3, family(
    gaussian) link(identity)
178
179
180
181 *** GLM ANALYSIS OF QALYS AT 12-MONTH FOLLOW-UP (T2+T3)
182
183 ** Analysis of QALYS - 12-month follow-up (T2+T3)
184
185 * Adjusted for baseline utility, baseline outcome and stratification factors
186
187 glm qalytot i.group AQoL8DUtility_1 phqdep_total_impute_t i.clinic_0 i.risk, family(
    gaussian) link(identity)
188
189 * Subgroup analysis
190
191 glm qalytot i.group AQoL8DUtility_1 phqdep_total_impute_t i.clinic_0 if risk==1, family(
    gaussian) link(identity)
192 glm qalytot i.group AQoL8DUtility_1 phqdep_total_impute_t i.clinic_0 if risk==2, family(
    gaussian) link(identity)
193 glm qalytot i.group AQoL8DUtility_1 phqdep_total_impute_t i.clinic_0 if risk==3, family(
    gaussian) link(identity)
194
195
196
197 *****
198 ***** END OF MODULE 1 - COMPLETE CASE ANALYSIS *****
199 *****
200
201
202
203
204
205
206 *****
207 ***** START OF MODULE 2 - IMPUTATION ANALYSIS *****
208 *****
209
210
211 *****
212 ***** DATA PREPARATION *****
213 *****

```

```

214
215 *** PREPARATORY CODE FOR MULTIPLE IMPUTATION ANALYSIS
216
217 ** Set working directory
218
219 cd "C:\Stata"
220
221
222 ** Load original dataset, keep in-scope variables and save the revised dataset
223
224 clear all
225 use "C:\Stata\TargetD_MERGED_edited.dta", replace
226
227 global var_sid study_id
228
229 global var_reg group phqdep_total_impute_t clinic_0 risk /// *Regular_variables
230 age_num_0 gender_0 costintv SA1_costintv SA2_costintv
231
232 global var_imp costtohealthprof_2 costtotervisit_2 /// *Imputed_variables
233 costtotovnstay_2 costtotdiagtest_2 costtotmed_2 ///
234 costtohealthprof_3 costtotervisit_3 costtotovnstay_3 ///
235 costtotdiagtest_3 costtotmed_3 ///
236 costtotprodloss_2 costtotprodloss_3 ///
237 AqoL8DUtility_1 AqoL8DUtility_2 AqoL8DUtility_3 ///
238 phqdep_total_impute_2 phqdep_total_impute_3
239
240 global var_adj education_rec_0 employment_0 /// *SA3_adjustment_variables
241 card_none_0 illness_t health_0 live_alone_0 ///
242 incomerec2_t psychpast_visited_0 antidepressants_0
243
244 keep $var_sid $var_reg $var_imp $var_adj
245 order $var_sid $var_reg $var_imp $var_adj
246
247 save "C:\Stata\TargetD_MERGED_inscope.dta", replace
248
249
250 ** Load revised dataset containing only the in-scope variables
251
252 clear all
253 use "C:\Stata\TargetD_MERGED_inscope.dta", replace
254
255
256
257 *** SET UP IMPUTATION DATA SET AND REGISTER VARIABLES
258
259 ** Duplicate existing variables for the multiple imputation analysis
260
261 gen costtohealthprof_2_imp = costtohealthprof_2
262 gen costtotervisit_2_imp = costtotervisit_2
263 gen costtotovnstay_2_imp = costtotovnstay_2
264 gen costtotdiagtest_2_imp = costtotdiagtest_2
265 gen costtotmed_2_imp = costtotmed_2
266
267 gen costtohealthprof_3_imp = costtohealthprof_3
268 gen costtotervisit_3_imp = costtotervisit_3
269 gen costtotovnstay_3_imp = costtotovnstay_3
270 gen costtotdiagtest_3_imp = costtotdiagtest_3
271 gen costtotmed_3_imp = costtotmed_3
272
273 gen costtotprodloss_2_imp = costtotprodloss_2
274 gen costtotprodloss_3_imp = costtotprodloss_3
275
276 gen AqoL8DUtility_1_imp = AqoL8DUtility_1
277 gen AqoL8DUtility_2_imp = AqoL8DUtility_2
278 gen AqoL8DUtility_3_imp = AqoL8DUtility_3
279
280 gen phqdep_total_impute_2_imp = phqdep_total_impute_2
281 gen phqdep_total_impute_3_imp = phqdep_total_impute_3
282
283
284 ** MI estimation commands
285
286 * Declare MI data set
287
288 mi set flong
289
290 * Register variables to be imputed
291
292 mi register imputed costtohealthprof_2_imp costtotervisit_2_imp costtotovnstay_2_imp ///

```

```

293 costtotdiagtest_2_imp costtotmed_2_imp costtothealthprof_3_imp ///
294 costtotervisit_3_imp costtotovnstay_3_imp costtotdiagtest_3_imp ///
295 costtotmed_3_imp costtotprodloss_2_imp costtotprodloss_3_imp ///
296 AqoL8DUtility_1_imp AqoL8DUtility_2_imp AqoL8DUtility_3_imp ///
297 phqdep_total_impute_2_imp phqdep_total_impute_3_imp
298
299 mi register regular $var_reg $var_adj
300
301 * Perform multiple imputation
302
303 mi impute chained ///
304 (pmm, knn(10)) AqoL8DUtility_1_imp AqoL8DUtility_2_imp AqoL8DUtility_3_imp ///
305 phqdep_total_impute_2_imp phqdep_total_impute_3_imp ///
306 costtothealthprof_2_imp costtotervisit_2_imp costtotovnstay_2_imp ///
307 costtotdiagtest_2_imp costtotmed_2_imp costtothealthprof_3_imp ///
308 costtotervisit_3_imp costtotovnstay_3_imp costtotdiagtest_3_imp ///
309 costtotmed_3_imp costtotprodloss_2_imp costtotprodloss_3_imp ///
310 = i.group i.gender_0 i.clinic_0 age_num_0 education_rec_0 psychpast_visited_0, ///
311 by(risk) add(100) burnin(100) rseed(2812281) dots
312
313 * Generate (and register) passive variables
314
315 mi passive: gen costhealthsector_2_imp = costtothealthprof_2_imp + costtotervisit_2_imp +
///
316 costtotovnstay_2_imp + costtotdiagtest_2_imp + ///
317 costtotmed_2_imp + costintv
318 mi passive: gen costhealthsector_3_imp = costtothealthprof_3_imp + costtotervisit_3_imp +
///
319 costtotovnstay_3_imp + costtotdiagtest_3_imp + ///
320 costtotmed_3_imp
321 mi passive: gen costhealthsectortot_imp = costhealthsector_2_imp + costhealthsector_3_imp
322
323 mi passive: gen costsocietal_2_imp = costhealthsector_2_imp + costtotprodloss_2_imp
324 mi passive: gen costsocietal_3_imp = costhealthsector_3_imp + costtotprodloss_3_imp
325 mi passive: gen costsocietaltot_imp = costsocietal_2_imp + costsocietal_3_imp
326
327 mi passive: gen qaly_2_imp = 0.5*(AqoL8DUtility_1_imp + AqoL8DUtility_2_imp)*(3/12)
328 mi passive: gen qaly_3_imp = 0.5*(AqoL8DUtility_2_imp + AqoL8DUtility_3_imp)*(9/12)
329 mi passive: gen qalytot_imp = qaly_2_imp + qaly_3_imp
330
331 mi passive: gen SA1_costhealthsector_2_imp = costtothealthprof_2_imp +
costtotervisit_2_imp + ///
332 costtotovnstay_2_imp + costtotdiagtest_2_imp
333 + ///
334 costtotmed_2_imp + SA1_costintv
335 mi passive: gen SA1_costhealthsectortot_imp = SA1_costhealthsector_2_imp +
costhealthsector_3_imp
336
337 mi passive: gen SA1_costsocietal_2_imp = SA1_costhealthsector_2_imp + costtotprodloss_2_imp
338 mi passive: gen SA1_costsocietaltot_imp = SA1_costsocietal_2_imp + costsocietal_3_imp
339
340 mi passive: gen SA2_costhealthsector_2_imp = costtothealthprof_2_imp +
costtotervisit_2_imp + ///
341 costtotovnstay_2_imp + costtotdiagtest_2_imp
342 + ///
343 costtotmed_2_imp + SA2_costintv
344 mi passive: gen SA2_costhealthsectortot_imp = SA2_costhealthsector_2_imp +
costhealthsector_3_imp
345
346 mi passive: gen SA2_costsocietal_2_imp = SA2_costhealthsector_2_imp + costtotprodloss_2_imp
347 mi passive: gen SA2_costsocietaltot_imp = SA2_costsocietal_2_imp + costsocietal_3_imp
348
349 * Save copy of the multiple imputation data set
350 describe, short
351 save "C:\Stata\TargetD_MERGED_MI_update.dta", replace
352
353 * Clear data set from memory
354 clear all
355
356
357
358 *****
359 *** TARGET_D - ANALYSIS OF IMPUTED DATA ***
360 *****
361
362 *** Set working directory
363

```

```

364 cd "C:\Stata"
365
366
367 *** LOAD IMPUTED DATA SET
368
369 use "C:\Stata\TargetD_MERGED_MI_update.dta", clear
370 describe, short
371
372
373 *** BASE CASE STATISTICAL ANALYSES USING IMPUTED DATA SET
374
375 ** GLM analysis of cost variables
376
377 * Analysis of health sector costs at 3-month follow-up (T2)
378
379 mi estimate, eform post: glm costhealthsector_2_imp i.group phqdep_total_impute_t i.
clinic_0 i.risk, family(gamma) link(log)
380 mimrgns group, predict(xb) eform
381
382 * Subgroup analysis
383
384 mi estimate, eform post: glm costhealthsector_2_imp i.group phqdep_total_impute_t i.
clinic_0 if risk==1, family(gamma) link(log)
385 mimrgns group, predict(xb) eform
386
387 mi estimate, eform post: glm costhealthsector_2_imp i.group phqdep_total_impute_t i.
clinic_0 if risk==2, family(gamma) link(log)
388 mimrgns group, predict(xb) eform
389
390 mi estimate, eform post: glm costhealthsector_2_imp i.group phqdep_total_impute_t i.
clinic_0 if risk==3, family(gamma) link(log)
391 mimrgns group, predict(xb) eform
392
393 * Analysis of health sector costs at 12-month follow-up (T2+T3)
394
395 mi estimate, eform post: glm costhealthsectortot_imp i.group phqdep_total_impute_t i.
clinic_0 i.risk, family(gamma) link(log)
396 mimrgns group, predict(xb) eform
397
398 * Subgroup analysis
399
400 mi estimate, eform post: glm costhealthsectortot_imp i.group phqdep_total_impute_t i.
clinic_0 if risk==1, family(gamma) link(log)
401 mimrgns group, predict(xb) eform
402
403 mi estimate, eform post: glm costhealthsectortot_imp i.group phqdep_total_impute_t i.
clinic_0 if risk==2, family(gamma) link(log)
404 mimrgns group, predict(xb) eform
405
406 mi estimate, eform post: glm costhealthsectortot_imp i.group phqdep_total_impute_t i.
clinic_0 if risk==3, family(gamma) link(log)
407 mimrgns group, predict(xb) eform
408
409 * Analysis of societal costs at 3-month follow-up (T2)
410
411 mi estimate, eform post: glm costsocietal_2_imp i.group phqdep_total_impute_t i.clinic_0 i
.risk, family(gamma) link(log)
412 mimrgns group, predict(xb) eform
413
414 * Subgroup analysis
415
416 mi estimate, eform post: glm costsocietal_2_imp i.group phqdep_total_impute_t i.clinic_0
if risk==1, family(gamma) link(log)
417 mimrgns group, predict(xb) eform
418
419 mi estimate, eform post: glm costsocietal_2_imp i.group phqdep_total_impute_t i.clinic_0
if risk==2, family(gamma) link(log)
420 mimrgns group, predict(xb) eform
421
422 mi estimate, eform post: glm costsocietal_2_imp i.group phqdep_total_impute_t i.clinic_0
if risk==3, family(gamma) link(log)
423 mimrgns group, predict(xb) eform
424
425 * Analysis of societal costs at 12-month follow-up (T2+T3)
426
427 mi estimate, eform post: glm costsocietaltot_imp i.group phqdep_total_impute_t i.clinic_0
i.risk, family(gamma) link(log)
428 mimrgns group, predict(xb) eform
429

```

```

430 * Subgroup analysis
431
432 mi estimate, eform post: glm costsocietal_tot_imp i.group phqdep_total_impute_t i.clinic_0
if risk==1, family(gamma) link(log)
433 mimrgns group, predict(xb) eform
434
435 mi estimate, eform post: glm costsocietal_tot_imp i.group phqdep_total_impute_t i.clinic_0
if risk==2, family(gamma) link(log)
436 mimrgns group, predict(xb) eform
437
438 mi estimate, eform post: glm costsocietal_tot_imp i.group phqdep_total_impute_t i.clinic_0
if risk==3, family(gamma) link(log)
439 mimrgns group, predict(xb) eform
440
441
442 ** GLM analysis of QALY variables
443
444 * 3-month follow-up (T2)
445
446 mi estimate: glm qaly_2_imp i.group AQL8DUtility_1_imp phqdep_total_impute_t i.clinic_0 i
.risk, family(gaussian) link(identity)
447 mimrgns group, predict(xb)
448
449 * Subgroup analysis
450
451 mi estimate: glm qaly_2_imp i.group AQL8DUtility_1_imp phqdep_total_impute_t i.clinic_0
if risk==1, family(gaussian) link(identity)
452 mimrgns group, predict(xb)
453
454 mi estimate: glm qaly_2_imp i.group AQL8DUtility_1_imp phqdep_total_impute_t i.clinic_0
if risk==2, family(gaussian) link(identity)
455 mimrgns group, predict(xb)
456
457 mi estimate: glm qaly_2_imp i.group AQL8DUtility_1_imp phqdep_total_impute_t i.clinic_0
if risk==3, family(gaussian) link(identity)
458 mimrgns group, predict(xb)
459
460 * 12-month follow-up (T2+T3)
461
462 mi estimate: glm qalytot_imp i.group AQL8DUtility_1_imp phqdep_total_impute_t i.clinic_0
i.risk, family(gaussian) link(identity)
463 mimrgns group, predict(xb)
464
465 * Subgroup analysis
466
467 mi estimate: glm qalytot_imp i.group AQL8DUtility_1_imp phqdep_total_impute_t i.clinic_0
if risk==1, family(gaussian) link(identity)
468 mimrgns group, predict(xb)
469
470 mi estimate: glm qalytot_imp i.group AQL8DUtility_1_imp phqdep_total_impute_t i.clinic_0
if risk==2, family(gaussian) link(identity)
471 mimrgns group, predict(xb)
472
473 mi estimate: glm qalytot_imp i.group AQL8DUtility_1_imp phqdep_total_impute_t i.clinic_0
if risk==3, family(gaussian) link(identity)
474 mimrgns group, predict(xb)
475
476
477
478 *** SENSITIVITY ANALYSES USING IMPUTED DATA SET
479
480 ** SA1 -- GLM analysis of cost variables
481
482 * Analysis of health sector costs at 3-month follow-up (T2)
483
484 mi estimate, eform post: glm SA1_costhealthsector_2_imp i.group phqdep_total_impute_t i.
clinic_0 i.risk, family(gamma) link(log)
485
486 * Subgroup analysis
487
488 mi estimate, eform post: glm SA1_costhealthsector_2_imp i.group phqdep_total_impute_t i.
clinic_0 if risk==1, family(gamma) link(log)
489 mi estimate, eform post: glm SA1_costhealthsector_2_imp i.group phqdep_total_impute_t i.
clinic_0 if risk==2, family(gamma) link(log)
490 mi estimate, eform post: glm SA1_costhealthsector_2_imp i.group phqdep_total_impute_t i.
clinic_0 if risk==3, family(gamma) link(log)
491
492 * Analysis of health sector costs at 12-month follow-up (T2+T3)
493

```

NOTE: Sensitivity analysis SA1 involves the inclusion of sunk costs for the development of the Target-D CPT (cost of screening changed from \$0.96 per person to \$2.30 per person).

```

494 mi estimate, eform post: glm SA1_costhealthsectortot_imp i.group phqdep_total_impute_t i.
      clinic_0 i.risk, family(gamma) link(log)
495
496 * Subgroup analysis
497
498 mi estimate, eform post: glm SA1_costhealthsectortot_imp i.group phqdep_total_impute_t i.
      clinic_0 if risk==1, family(gamma) link(log)
499 mi estimate, eform post: glm SA1_costhealthsectortot_imp i.group phqdep_total_impute_t i.
      clinic_0 if risk==2, family(gamma) link(log)
500 mi estimate, eform post: glm SA1_costhealthsectortot_imp i.group phqdep_total_impute_t i.
      clinic_0 if risk==3, family(gamma) link(log)
501
502 * Analysis of societal costs at 3-month follow-up (T2)
503
504 mi estimate, eform post: glm SA1_costsocietal_2_imp i.group phqdep_total_impute_t i.
      clinic_0 i.risk, family(gamma) link(log)
505
506 * Subgroup analysis
507
508 mi estimate, eform post: glm SA1_costsocietal_2_imp i.group phqdep_total_impute_t i.
      clinic_0 if risk==1, family(gamma) link(log)
509 mi estimate, eform post: glm SA1_costsocietal_2_imp i.group phqdep_total_impute_t i.
      clinic_0 if risk==2, family(gamma) link(log)
510 mi estimate, eform post: glm SA1_costsocietal_2_imp i.group phqdep_total_impute_t i.
      clinic_0 if risk==3, family(gamma) link(log)
511
512 * Analysis of societal costs at 12-month follow-up (T2+T3)
513
514 mi estimate, eform post: glm SA1_costsocietal_tot_imp i.group phqdep_total_impute_t i.
      clinic_0 i.risk, family(gamma) link(log)
515
516 * Subgroup analysis
517
518 mi estimate, eform post: glm SA1_costsocietal_tot_imp i.group phqdep_total_impute_t i.
      clinic_0 if risk==1, family(gamma) link(log)
519 mi estimate, eform post: glm SA1_costsocietal_tot_imp i.group phqdep_total_impute_t i.
      clinic_0 if risk==2, family(gamma) link(log)
520 mi estimate, eform post: glm SA1_costsocietal_tot_imp i.group phqdep_total_impute_t i.
      clinic_0 if risk==3, family(gamma) link(log)
521
522 NOTE: Sensitivity analysis SA2 involves a higher unit
523 cost for the clinician-guided iCBT course delivered to
524 the moderate prognostic group (unit cost changed
525 from $132 per person to $222 per person).
526
527 ** SA2 -- GLM analysis of cost variables
528
529 * Analysis of health sector costs at 3-month follow-up (T2)
530
531 mi estimate, eform post: glm SA2_costhealthsector_2_imp i.group phqdep_total_impute_t i.
      clinic_0 i.risk, family(gamma) link(log)
532
533 * Subgroup analysis
534
535 mi estimate, eform post: glm SA2_costhealthsector_2_imp i.group phqdep_total_impute_t i.
      clinic_0 if risk==1, family(gamma) link(log)
536 mi estimate, eform post: glm SA2_costhealthsector_2_imp i.group phqdep_total_impute_t i.
      clinic_0 if risk==2, family(gamma) link(log)
537 mi estimate, eform post: glm SA2_costhealthsector_2_imp i.group phqdep_total_impute_t i.
      clinic_0 if risk==3, family(gamma) link(log)
538
539 * Analysis of health sector costs at 12-month follow-up (T2+T3)
540
541 mi estimate, eform post: glm SA2_costhealthsectortot_imp i.group phqdep_total_impute_t i.
      clinic_0 i.risk, family(gamma) link(log)
542
543 * Subgroup analysis
544
545 mi estimate, eform post: glm SA2_costhealthsectortot_imp i.group phqdep_total_impute_t i.
      clinic_0 if risk==1, family(gamma) link(log)
546 mi estimate, eform post: glm SA2_costhealthsectortot_imp i.group phqdep_total_impute_t i.
      clinic_0 if risk==2, family(gamma) link(log)
547 mi estimate, eform post: glm SA2_costhealthsectortot_imp i.group phqdep_total_impute_t i.
      clinic_0 if risk==3, family(gamma) link(log)
548
549 * Analysis of societal costs at 3-month follow-up (T2)
550
551 mi estimate, eform post: glm SA2_costsocietal_2_imp i.group phqdep_total_impute_t i.
      clinic_0 i.risk, family(gamma) link(log)
552
553 * Subgroup analysis
554
555 mi estimate, eform post: glm SA2_costsocietal_2_imp i.group phqdep_total_impute_t i.
      clinic_0 i.risk, family(gamma) link(log)

```



```

552 clinic_0 if risk==1, family(gamma) link(log)
mi estimate, eform post: glm SA2_costsocietal_2_imp i.group phqdep_total_impute_t i.
553 clinic_0 if risk==2, family(gamma) link(log)
mi estimate, eform post: glm SA2_costsocietal_2_imp i.group phqdep_total_impute_t i.
clinic_0 if risk==3, family(gamma) link(log)
554
555 * Analysis of societal costs at 12-month follow-up (T2+T3)
556
557 mi estimate, eform post: glm SA2_costsocietal_tot_imp i.group phqdep_total_impute_t i.
clinic_0 i.risk, family(gamma) link(log)
558
559 * Subgroup analysis
560
561 mi estimate, eform post: glm SA2_costsocietal_tot_imp i.group phqdep_total_impute_t i.
clinic_0 if risk==1, family(gamma) link(log)
562 mi estimate, eform post: glm SA2_costsocietal_tot_imp i.group phqdep_total_impute_t i.
clinic_0 if risk==2, family(gamma) link(log)
563 mi estimate, eform post: glm SA2_costsocietal_tot_imp i.group phqdep_total_impute_t i.
clinic_0 if risk==3, family(gamma) link(log)
564
565
566 ** SA3 -- GLM analysis of cost and QALY variables after adjustment for variables
567 ** associated with non-response to the primary outcome measure (PHQ-9 score)
568
569 * Analysis of health sector costs at 3-month follow-up (T2)
570
571 mi estimate, eform post: glm costhealthsector_2_imp i.group phqdep_total_impute_t i.
clinic_0 i.risk age_num_0 i.gender_0 i.education_rec_0 i.employment_0 i.card_none_0 i.
illness_t i.health_0 i.live_alone_0 i.incomerec2_t i.psychpast_visited_0 i.
antidepressants_0, family(gamma) link(log)
572
573 * Subgroup analysis
574
575 mi estimate, eform post: glm costhealthsector_2_imp i.group phqdep_total_impute_t i.
clinic_0 age_num_0 i.gender_0 i.education_rec_0 i.employment_0 i.card_none_0 i.illness_t
i.health_0 i.live_alone_0 i.incomerec2_t i.psychpast_visited_0 i.antidepressants_0 if
576 risk==1, family(gamma) link(log)
mi estimate, eform post: glm costhealthsector_2_imp i.group phqdep_total_impute_t i.
clinic_0 age_num_0 i.gender_0 i.education_rec_0 i.employment_0 i.card_none_0 i.illness_t
i.health_0 i.live_alone_0 i.incomerec2_t i.psychpast_visited_0 i.antidepressants_0 if
577 risk==2, family(gamma) link(log)
mi estimate, eform post: glm costhealthsector_2_imp i.group phqdep_total_impute_t i.
clinic_0 age_num_0 i.gender_0 i.education_rec_0 i.employment_0 i.card_none_0 i.illness_t
i.health_0 i.live_alone_0 i.incomerec2_t i.psychpast_visited_0 i.antidepressants_0 if
578 risk==3, family(gamma) link(log)
579
580 * Analysis of health sector costs at 12-month follow-up (T2+T3)
581
582 mi estimate, eform post: glm costhealthsectortot_imp i.group phqdep_total_impute_t i.
clinic_0 i.risk age_num_0 i.gender_0 i.education_rec_0 i.employment_0 i.card_none_0 i.
illness_t i.health_0 i.live_alone_0 i.incomerec2_t i.psychpast_visited_0 i.
antidepressants_0, family(gamma) link(log)
583
584 * Subgroup analysis
585
586 mi estimate, eform post: glm costhealthsectortot_imp i.group phqdep_total_impute_t i.
clinic_0 age_num_0 i.gender_0 i.education_rec_0 i.employment_0 i.card_none_0 i.illness_t
i.health_0 i.live_alone_0 i.incomerec2_t i.psychpast_visited_0 i.antidepressants_0 if
587 risk==1, family(gamma) link(log)
mi estimate, eform post: glm costhealthsectortot_imp i.group phqdep_total_impute_t i.
clinic_0 age_num_0 i.gender_0 i.education_rec_0 i.employment_0 i.card_none_0 i.illness_t
i.health_0 i.live_alone_0 i.incomerec2_t i.psychpast_visited_0 i.antidepressants_0 if
588 risk==2, family(gamma) link(log)
mi estimate, eform post: glm costhealthsectortot_imp i.group phqdep_total_impute_t i.
clinic_0 age_num_0 i.gender_0 i.education_rec_0 i.employment_0 i.card_none_0 i.illness_t
i.health_0 i.live_alone_0 i.incomerec2_t i.psychpast_visited_0 i.antidepressants_0 if
589 risk==3, family(gamma) link(log)
590
591 * Analysis of societal costs at 3-month follow-up (T2)
592
593 mi estimate, eform post: glm costsocietal_2_imp i.group phqdep_total_impute_t i.clinic_0 i.
risk age_num_0 i.gender_0 i.education_rec_0 i.employment_0 i.card_none_0 i.illness_t i.
health_0 i.live_alone_0 i.incomerec2_t i.psychpast_visited_0 i.antidepressants_0, family
594 (gamma) link(log)
595
596 * Subgroup analysis
597
598 mi estimate, eform post: glm costsocietal_2_imp i.group phqdep_total_impute_t i.clinic_0
age_num_0 i.gender_0 i.education_rec_0 i.employment_0 i.card_none_0 i.illness_t i.

```

```

health_0 i.live_alone_0 i.incomerec2_t i.psychpast_visited_0 i.antidepressants_0 if risk
==1, family(gamma) link(log)
596 mi estimate, eform post: glm costsocietal_2_imp i.group phqdep_total_impute_t i.clinic_0
age_num_0 i.gender_0 i.education_rec_0 i.employment_0 i.card_none_0 i.illness_t i.
health_0 i.live_alone_0 i.incomerec2_t i.psychpast_visited_0 i.antidepressants_0 if risk
==2, family(gamma) link(log)
597 mi estimate, eform post: glm costsocietal_2_imp i.group phqdep_total_impute_t i.clinic_0
age_num_0 i.gender_0 i.education_rec_0 i.employment_0 i.card_none_0 i.illness_t i.
health_0 i.live_alone_0 i.incomerec2_t i.psychpast_visited_0 i.antidepressants_0 if risk
==3, family(gamma) link(log)
598
599 * Analysis of societal costs at 12-month follow-up (T2+T3)
600
601 mi estimate, eform post: glm costsocietal_tot_imp i.group phqdep_total_impute_t i.clinic_0
i.risk age_num_0 i.gender_0 i.education_rec_0 i.employment_0 i.card_none_0 i.illness_t i.
health_0 i.live_alone_0 i.incomerec2_t i.psychpast_visited_0 i.antidepressants_0,
family(gamma) link(log)
602
603 * Subgroup analysis
604
605 mi estimate, eform post: glm costsocietal_tot_imp i.group phqdep_total_impute_t i.clinic_0
age_num_0 i.gender_0 i.education_rec_0 i.employment_0 i.card_none_0 i.illness_t i.
health_0 i.live_alone_0 i.incomerec2_t i.psychpast_visited_0 i.antidepressants_0 if risk
==1, family(gamma) link(log)
606 mi estimate, eform post: glm costsocietal_tot_imp i.group phqdep_total_impute_t i.clinic_0
age_num_0 i.gender_0 i.education_rec_0 i.employment_0 i.card_none_0 i.illness_t i.
health_0 i.live_alone_0 i.incomerec2_t i.psychpast_visited_0 i.antidepressants_0 if risk
==2, family(gamma) link(log)
607 mi estimate, eform post: glm costsocietal_tot_imp i.group phqdep_total_impute_t i.clinic_0
age_num_0 i.gender_0 i.education_rec_0 i.employment_0 i.card_none_0 i.illness_t i.
health_0 i.live_alone_0 i.incomerec2_t i.psychpast_visited_0 i.antidepressants_0 if risk
==3, family(gamma) link(log)
608
609 * Analysis of QALYS at 3-month follow-up (T2)
610
611 mi estimate: glm qaly_2_imp i.group AqoL8Dutility_1_imp phqdep_total_impute_t i.clinic_0 i
.risk age_num_0 i.gender_0 i.education_rec_0 i.employment_0 i.card_none_0 i.illness_t i.
health_0 i.live_alone_0 i.incomerec2_t i.psychpast_visited_0 i.antidepressants_0, family
(gaussian) link(identity)
612
613 * Subgroup analysis
614
615 mi estimate: glm qaly_2_imp i.group AqoL8Dutility_1_imp phqdep_total_impute_t i.clinic_0
age_num_0 i.gender_0 i.education_rec_0 i.employment_0 i.card_none_0 i.illness_t i.
health_0 i.live_alone_0 i.incomerec2_t i.psychpast_visited_0 i.antidepressants_0 if risk
==1, family(gaussian) link(identity)
616 mi estimate: glm qaly_2_imp i.group AqoL8Dutility_1_imp phqdep_total_impute_t i.clinic_0
age_num_0 i.gender_0 i.education_rec_0 i.employment_0 i.card_none_0 i.illness_t i.
health_0 i.live_alone_0 i.incomerec2_t i.psychpast_visited_0 i.antidepressants_0 if risk
==2, family(gaussian) link(identity)
617 mi estimate: glm qaly_2_imp i.group AqoL8Dutility_1_imp phqdep_total_impute_t i.clinic_0
age_num_0 i.gender_0 i.education_rec_0 i.employment_0 i.card_none_0 i.illness_t i.
health_0 i.live_alone_0 i.incomerec2_t i.psychpast_visited_0 i.antidepressants_0 if risk
==3, family(gaussian) link(identity)
618
619 * Analysis of QALYS at 12-month follow-up (T2+T3)
620
621 mi estimate: glm qalytot_imp i.group AqoL8Dutility_1_imp phqdep_total_impute_t i.clinic_0
i.risk age_num_0 i.gender_0 i.education_rec_0 i.employment_0 i.card_none_0 i.illness_t i.
health_0 i.live_alone_0 i.incomerec2_t i.psychpast_visited_0 i.antidepressants_0,
family(gaussian) link(identity)
622
623 * Subgroup analysis
624
625 mi estimate: glm qalytot_imp i.group AqoL8Dutility_1_imp phqdep_total_impute_t i.clinic_0
age_num_0 i.gender_0 i.education_rec_0 i.employment_0 i.card_none_0 i.illness_t i.
health_0 i.live_alone_0 i.incomerec2_t i.psychpast_visited_0 i.antidepressants_0 if risk
==1, family(gaussian) link(identity)
626 mi estimate: glm qalytot_imp i.group AqoL8Dutility_1_imp phqdep_total_impute_t i.clinic_0
age_num_0 i.gender_0 i.education_rec_0 i.employment_0 i.card_none_0 i.illness_t i.
health_0 i.live_alone_0 i.incomerec2_t i.psychpast_visited_0 i.antidepressants_0 if risk
==2, family(gaussian) link(identity)
627 mi estimate: glm qalytot_imp i.group AqoL8Dutility_1_imp phqdep_total_impute_t i.clinic_0
age_num_0 i.gender_0 i.education_rec_0 i.employment_0 i.card_none_0 i.illness_t i.
health_0 i.live_alone_0 i.incomerec2_t i.psychpast_visited_0 i.antidepressants_0 if risk
==3, family(gaussian) link(identity)
628
629
630 ** Clear data set from memory

```

```

631
632 clear all
633
634
635
636 *****
637 *****      END OF MODULE 2 - IMPUTATION ANALYSIS
638 *****
639
640
641
642
643
644
645 *****
646 *****      START OF MODULE 3 - BOOTSTRAP ANALYSIS
647 *****
648
649
650 *****
651 ***  TARGET_D - BOOTSTRAP WITH NESTED MULTIPLE IMPUTATION  ***
652 *****
653
654 **
655 ** The resampling method adopted in this code comprises the 'single imputation
656 ** nested in bootstrapping' approach advocated by Brand et al., (2016) and other
657 ** leading health economists, such as Prof Andrew Briggs. The code presented
658 ** below involves using the MICE command to impute a singular complete dataset,
659 ** then performing GLM analyses to examine differences in mean costs and QALYs.
660 **
661 ** The margins command (dydx) is then used to estimate the marginal change in
662 ** costs/QALYs due to a one-unit change in the intervention group (where
663 ** 0 = control and 1 = intervention). ICERs are subsequently estimated as the
664 ** difference in mean costs divided by the difference in mean QALYs.
665 **
666 ** Brand et al., 2016 -- https://doi.org/10.1002/sim.7956
667 **
668 ** NOTE: The nested bootstrap analysis has the advantage of enabling
669 ** the utilisation of the margins command. There is currently no
670 ** straightforward method by which to use the margins command alongside
671 ** the 'MI estimate' commands. See link below for further reading on
672 ** this issue.
673 **
674 ** Link:
675 https://stats.idre.ucla.edu/stata/faq/how-can-i-get-margins-and-marginsplot-with-multiply-i
676 mputed-data/
677 **
678 ** The bootstrap percentile method was used to estimate 95% confidence intervals
679 ** (95% CIs) around the difference in mean costs, difference in mean QALYs and
680 ** mean ICERs. This involves identifying the 2.5th and 97.5th percentiles of the
681 ** 'm' bootstrap resamples that are generated. A total of 1,000 bootstrap resamples
682 ** (m = 1,000) were produced.
683 **
684
685
686 *** PREPARATORY CODE
687
688 ** Set working directory
689
690 cd "C:\Stata"
691
692
693 ** Load dataset and keep in-scope variables
694
695 clear all
696 use "C:\Stata\TargetD_MERGED_inscope.dta", replace
697
698 global var_sid study_id
699
700 global var_reg group phqdep_total_impute_t clinic_0 risk /// *Regular_variables
701 age_num_0 gender_0 costintv SA1_costintv SA2_costintv
702
703 global var_imp costtothealthprof_2 costtotervisit_2 /// *Imputed_variables
704 costtotovnstay_2 costtotdiagtest_2 costtotmed_2 ///
705 costtothealthprof_3 costtotervisit_3 costtotovnstay_3 ///
706 costtotdiagtest_3 costtotmed_3 ///
707 costtotprodloss_2 costtotprodloss_3 ///

```

```

708             AqoL8DUtility_1 AqoL8DUtility_2 AqoL8DUtility_3 ///
709             phqdep_total_impute_2 phqdep_total_impute_3
710
711 global var_adj education_rec_0 employment_0 /// *SA3_adjustment_variables
712             card_none_0 illness_t health_0 live_alone_0 ///
713             incomerec2_t psychpast_visited_0 antidepressants_0
714
715 keep $var_sid $var_reg $var_imp $var_adj
716 order $var_sid $var_reg $var_imp $var_adj
717
718
719 ** Duplicate existing variables for the multiple imputation analysis
720
721 qui: gen costtohealthprof_2_imp = costtohealthprof_2
722 qui: gen costtotervisit_2_imp = costtotervisit_2
723 qui: gen costtotovnstay_2_imp = costtotovnstay_2
724 qui: gen costtotdiagtest_2_imp = costtotdiagtest_2
725 qui: gen costtotmed_2_imp = costtotmed_2
726
727 qui: gen costtohealthprof_3_imp = costtohealthprof_3
728 qui: gen costtotervisit_3_imp = costtotervisit_3
729 qui: gen costtotovnstay_3_imp = costtotovnstay_3
730 qui: gen costtotdiagtest_3_imp = costtotdiagtest_3
731 qui: gen costtotmed_3_imp = costtotmed_3
732
733 qui: gen costtotprodloss_2_imp = costtotprodloss_2
734 qui: gen costtotprodloss_3_imp = costtotprodloss_3
735
736 qui: gen AqoL8DUtility_1_imp = AqoL8DUtility_1
737 qui: gen AqoL8DUtility_2_imp = AqoL8DUtility_2
738 qui: gen AqoL8DUtility_3_imp = AqoL8DUtility_3
739
740 qui: gen phqdep_total_impute_2_imp = phqdep_total_impute_2
741 qui: gen phqdep_total_impute_3_imp = phqdep_total_impute_3
742
743
744 ** MI estimation commands
745
746 * Declare MI data set
747 *
748 * ----- IMPORTANT: DATA MUST BE SET IN THE WIDE FORMAT!! -----
749 * ----- BOOTSTRAP IS INCOMPATIBLE WITH THE LONG FORMAT -----
750
751 mi set wide
752
753 * Register variables to be imputed
754
755 mi register imputed costtohealthprof_2_imp costtotervisit_2_imp costtotovnstay_2_imp ///
756             costtotdiagtest_2_imp costtotmed_2_imp costtohealthprof_3_imp ///
757             costtotervisit_3_imp costtotovnstay_3_imp costtotdiagtest_3_imp ///
758             costtotmed_3_imp costtotprodloss_2_imp costtotprodloss_3_imp ///
759             AqoL8DUtility_1_imp AqoL8DUtility_2_imp AqoL8DUtility_3_imp ///
760             phqdep_total_impute_2_imp phqdep_total_impute_3_imp
761
762 mi register regular $var_reg $var_adj
763
764 * Generate (and register) passive variables
765
766 mi passive: gen costhealthsector_2_imp = costtohealthprof_2_imp + costtotervisit_2_imp +
767             ///
768             costtotovnstay_2_imp + costtotdiagtest_2_imp + ///
769             costtotmed_2_imp + costintv
770
771 mi passive: gen costhealthsector_3_imp = costtohealthprof_3_imp + costtotervisit_3_imp +
772             ///
773             costtotovnstay_3_imp + costtotdiagtest_3_imp + ///
774             costtotmed_3_imp
775
776 mi passive: gen costhealthsectortot_imp = costhealthsector_2_imp + costhealthsector_3_imp
777
778 mi passive: gen costsocietal_2_imp = costhealthsector_2_imp + costtotprodloss_2_imp
779 mi passive: gen costsocietal_3_imp = costhealthsector_3_imp + costtotprodloss_3_imp
780 mi passive: gen costsocietaltot_imp = costsocietal_2_imp + costsocietal_3_imp
781
782 mi passive: gen qaly_2_imp = 0.5*(AqoL8DUtility_1_imp + AqoL8DUtility_2_imp)*(3/12)
783 mi passive: gen qaly_3_imp = 0.5*(AqoL8DUtility_2_imp + AqoL8DUtility_3_imp)*(9/12)
784 mi passive: gen qalytot_imp = qaly_2_imp + qaly_3_imp
785
786
787 ** Save the declared multiple imputation dataset template

```

```

785 save "C:\Stata\TargetD_MERGED_inscope_MI_template.dta", replace
786
787
788
789 *** ESTIMATE ICERS AT 3-MONTH FOLLOW-UP (T2) AND 12-MONTH FOLLOW-UP (T2+T3)
790
791 ** BS10: Adjusted - Cost per QALY | Health sector & Societal | 3 mths & 12 mths
792
793 * Load multiple imputation dataset template
794
795 clear all
796 use "C:\Stata\TargetD_MERGED_inscope_MI_template.dta", clear
797
798
799 * Declare additional covariates for GLM analyses nested within bootstrap
800
801 global var_cov phqdep_total_impute_t i.clinic_0 i.risk
802
803
804 * Define program
805
806 program
807
808     ** Preserve data environment to be restored after program termination
809
810     preserve
811
812     ** Perform multiple imputation
813
814     mi impute chained ///
815     (pmm, knn(10)) AqoL8DUtility_1_imp AqoL8DUtility_2_imp AqoL8DUtility_3_imp ///
816     phqdep_total_impute_2_imp phqdep_total_impute_3_imp ///
817     costtohealthprof_2_imp costtotervisit_2_imp costtotovnstay_2_imp ///
818     costtotdiagtest_2_imp costtotmed_2_imp costtohealthprof_3_imp ///
819     costtotervisit_3_imp costtotovnstay_3_imp costtotdiagtest_3_imp ///
820     costtotmed_3_imp costtotprodloss_2_imp costtotprodloss_3_imp ///
821     = i.group i.gender_0 i.clinic_0 age_num_0 education_rec_0 psychpast_visited_0, ///
822     by(risk) add(1) dots
823
824     * NOTE: Do not set the seed of the nested imputation within the bootstrap.
825     *       Also set the number of imputations to M=1.
826
827     ** Replace passive variables
828
829     mi passive: replace costhealthsector_2_imp = costtohealthprof_2_imp +
830     costtotervisit_2_imp + ///
831     costtotovnstay_2_imp + costtotdiagtest_2_imp + ///
832     costtotmed_2_imp + costintv
833     mi passive: replace costhealthsector_3_imp = costtohealthprof_3_imp +
834     costtotervisit_3_imp + ///
835     costtotovnstay_3_imp + costtotdiagtest_3_imp + ///
836     costtotmed_3_imp
837     mi passive: replace costhealthsectortot_imp = costhealthsector_2_imp +
838     costhealthsector_3_imp
839     mi passive: replace costsocietal_2_imp = costhealthsector_2_imp + costtotprodloss_2_imp
840     mi passive: replace costsocietal_3_imp = costhealthsector_3_imp + costtotprodloss_3_imp
841     mi passive: replace costsocietaltot_imp = costsocietal_2_imp + costsocietal_3_imp
842
843     mi passive: replace qaly_2_imp = 0.5*(AqoL8DUtility_1_imp + AqoL8DUtility_2_imp)*(3/12)
844     mi passive: replace qaly_3_imp = 0.5*(AqoL8DUtility_2_imp + AqoL8DUtility_3_imp)*(9/12)
845     mi passive: replace qalytot_imp = qaly_2_imp + qaly_3_imp
846
847     ** Extract single imputed dataset
848
849     mi extract 1, clear
850
851     ** Conduct GLM analysis using single MI dataset in memory
852
853     * GLM analysis of QALY variables - 3 months
854
855     glm qaly_2_imp i.group AqoL8DUtility_1_imp $var_cov, family(gaussian) link(identity)
856
857     margins, dydx(group)
858     return scalar q1 = e1(r(table),1,2)
859
860     * GLM analysis of QALY variables - 12 months

```

```

861   glm qalytot_imp i.group AqoL8DUtility_1_imp $var_cov, family(gaussian) link(identity)
862
863   margins, dydx(group)
864   return scalar q6 = e1(r(table),1,2)
865
866   * GLM analysis of Cost variables - 3 months, Health sector
867
868   glm costhealthsector_2_imp i.group $var_cov, family(gamma) link(log) eform
869
870   margins, dydx(group)
871   return scalar c1 = e1(r(table),1,2)
872
873   * GLM analysis of Cost variables - 3 months, Societal
874
875   glm costsocietal_2_imp i.group $var_cov, family(gamma) link(log) eform
876
877   margins, dydx(group)
878   return scalar c2 = e1(r(table),1,2)
879
880   * GLM analysis of Cost variables - 12 months, Health sector
881
882   glm costhealthsectortot_imp i.group $var_cov, family(gamma) link(log) eform
883
884   margins, dydx(group)
885   return scalar c6 = e1(r(table),1,2)
886
887   * GLM analysis of Cost variables - 12 months, Societal
888
889   glm costsocietaltot_imp i.group $var_cov, family(gamma) link(log) eform
890
891   margins, dydx(group)
892   return scalar c7 = e1(r(table),1,2)
893
894 end
895
896 * Perform bootstrap analysis
897
898 set seed 19
899
900 bootstrap inc_qalys_3m=r(q1) inc_costs_hlth_3m=r(c1) inc_costs_sctl_3m=r(c2) ///
901           inc_qalys_12m=r(q6) inc_costs_hlth_12m=r(c6) inc_costs_sctl_12m=r(c7), ///
902           reps(10) strata(group) saving(TargetD_Bootstrap_GLM_BS10, replace) : myBS10
903
904 use TargetD_Bootstrap_GLM_BS10, clear
905 estat bootstrap, all
906
907
908
909 *****
910 ***** END OF MODULE 3 - BOOTSTRAP ANALYSIS *****
911 *****
912
913
914

```
